# Supplementary material
Source: PubMed Central journal article supplement (PMC4145119)
Supplement: supp_tpc.114.126722_tpc136722_SupplementalData.pdf [file supp_tpc.114.126722_tpc136722_SupplementalData.pdf]

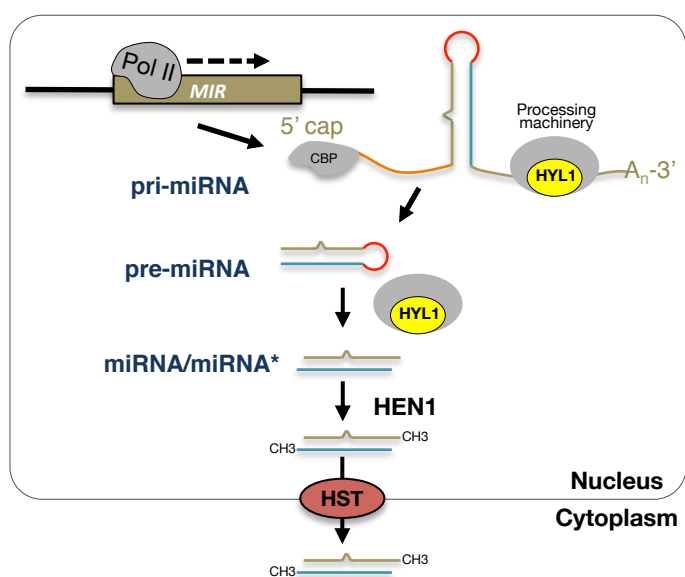

Supplemental Figure 1. Schematic overview of canonical miRNA biosynthesis (modified from Rogers and Chen, 2013).

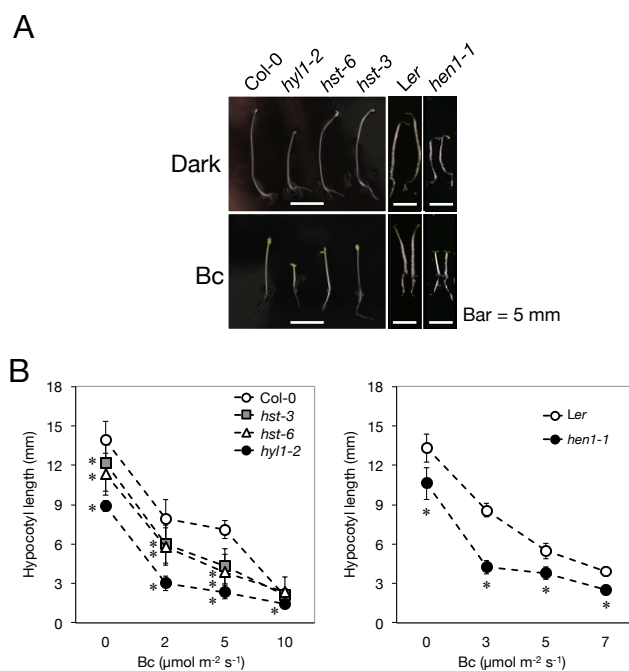

**Supplemental Figure 2. Skotomorphogenesis and photomorphogenesis are defective in miRNA biogenesis mutants**

The *hyl1-2*, *hen1-1*, *hst-3* and *hst-6* mutants show defects in hypocotyl elongation in the dark and light (A). However, the mutants are hypersensitive to continuous blue light (Bc)(B). Data are mean  $\pm$  SD. \*, significantly different from the corresponding wild type (Col-0 and *Ler*)( $p < 0.05$ , Student's *t* test;  $n = 16-32$ ).

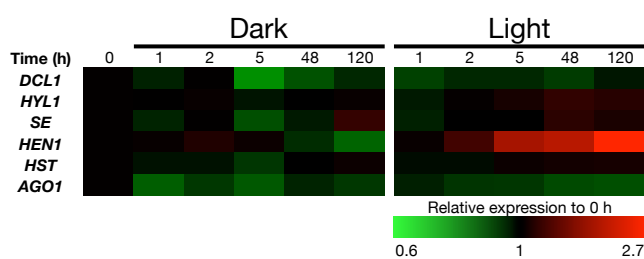

**Supplemental Figure 3. The transcript level of *HEN1* is light-upregulated**

Expression of miRNA biosynthetic genes *HEN1*, *DCL1*, *HYL1*, *SE*, *HST* and *AGO1* in etiolated seedlings under dark and light treatments at the indicated times from Genevestigator sample AT-00003 (repository name: PZ051203\_02). Gene expression for the times indicated was normalized to time 0.

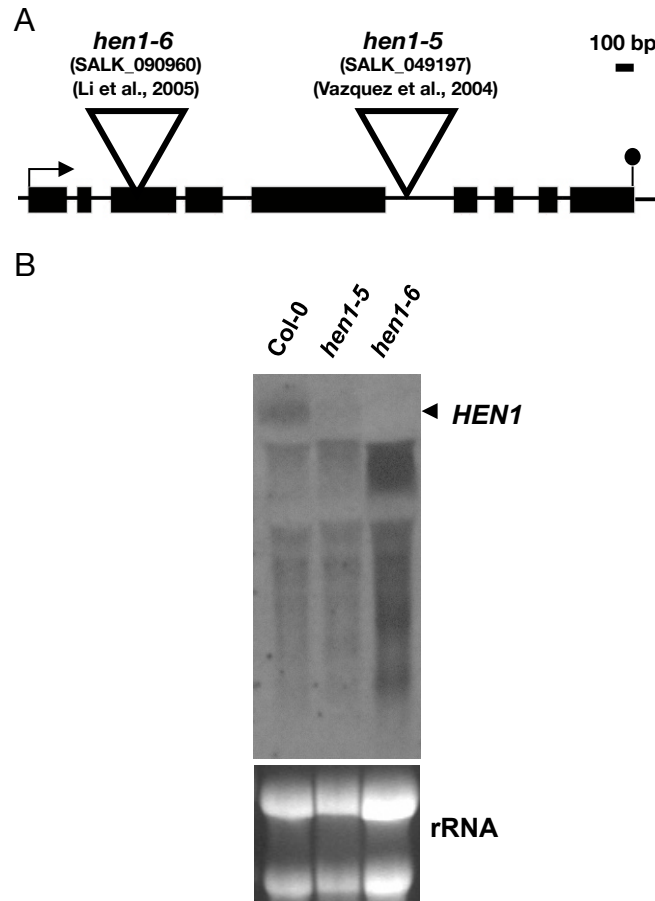

Supplemental Figure 4. **Molecular characterization of *hen1-5* and *hen1-6* mutants**

(A) SALK\_049197 (*hen1-5*) and SALK\_090960 (*hen1-6*) lines carried the T-DNA insertion in intron 5 and exon 3, respectively, of *HEN1*. The locations of the T-DNA and transcription start/end are marked on the *HEN1* gene model. (B) RNA gel blot analysis with a DNA probe spanning 1 to 500 bp of the *HEN1* coding region for profiling *HEN1* expression in the wild type (Col-0), *hen1-5* and *hen1-6*. Ethidium-bromide-stained rRNA is shown as a loading control.

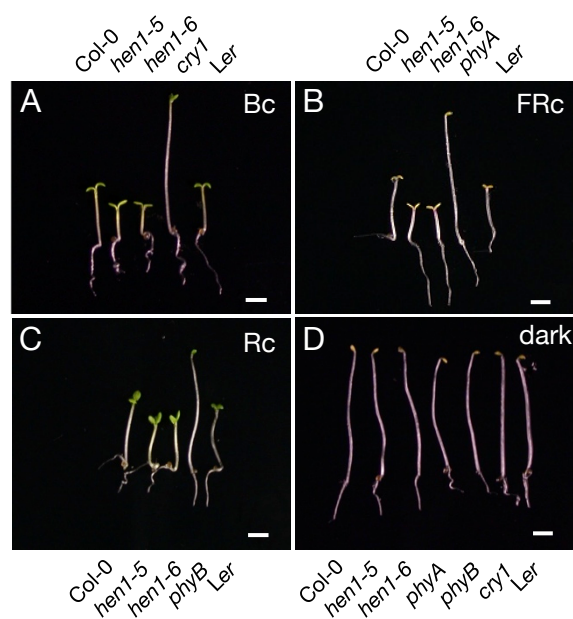

**Supplemental Figure 5. The *hen1* mutants are hypersensitive to blue (B), far-red (FR), and red (R) light**

Representative seedlings of 4-d-old seedlings of Col-0, *Ler*, *hen1-5*, *hen1-6*, *phyA*, *phyB* and *cry1* seedlings grown under continuous blue light (Bc) (A), FRc (B), Rc (C) or dark (D). Bar = 2 mm.

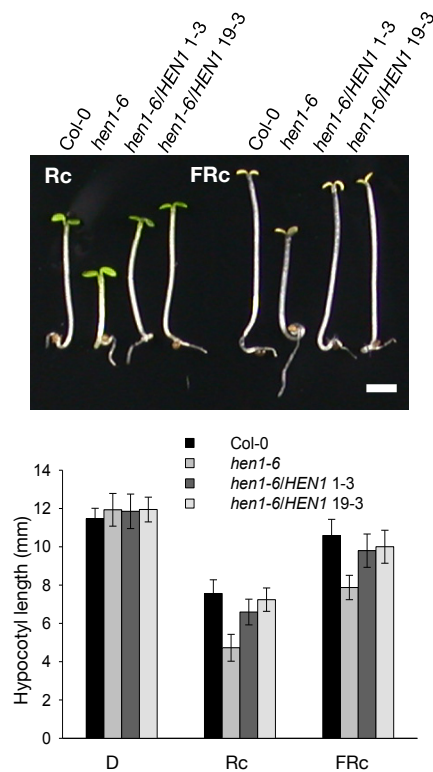

**Supplemental Figure 6. Functional complementation of *hen1* light-hypersensitive phenotype**

A genomic fragment harboring *HEN1* (-2,135 to +4,492 of *HEN1* locus) was generated by PCR with specific primers (Supplemental Table 1 online) and subcloned into the *SalI-PmlI* sites of the binary vector pCAMBIA1390 and introduced into *hen1-6*. Hypocotyl lengths of Col-0, *hen1-6*, and 2 representative complementation lines, *hen1-6/HEN1* 1-3 and *hen1-6/HEN1* 19-3, grown under dark (D), Rc ( $5 \mu\text{mol m}^{-2} \text{s}^{-1}$ ) or FRc ( $0.125 \text{ Wm}^{-2}$ ). Data are mean  $\pm$  SD. Bar = 2 mm.

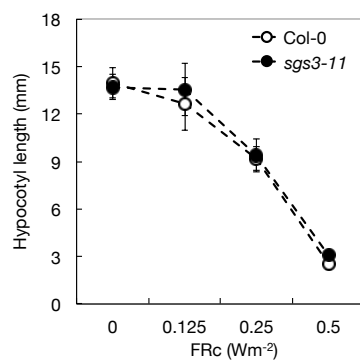

**Supplemental Figure 7. Effect of FR fluence rate on hypocotyl extension in wild-type and *sgs3-11* mutant seedlings**

Hypocotyl lengths of wild-type and *sgs3-11* seedlings grown under different FRC fluence rates for 4 days. Data are mean  $\pm$  SD.

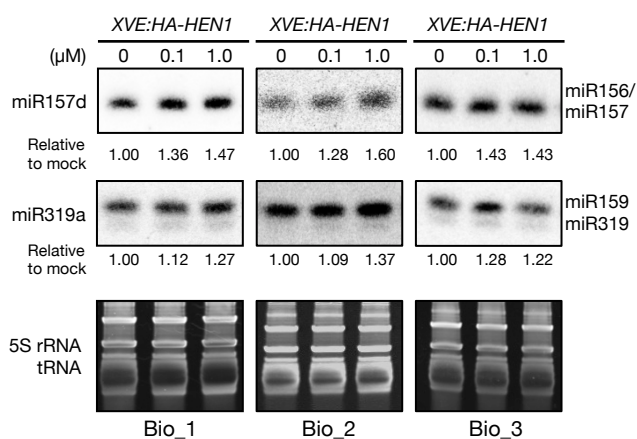

**Supplemental Figure 8. The levels of miR157 and miR159/319 are increased accompanied with increased level of HA-HEN1 protein.**

Three biological replicates of small RNA analyses of miR157 and miR159/319 expression levels. The replicate Bio\_1 was shown in Figure 5C. The numbers below the blots showed 5S rRNA- and tRNA-normalized miRNA fold increase in HA-HEN1-induced seedlings.



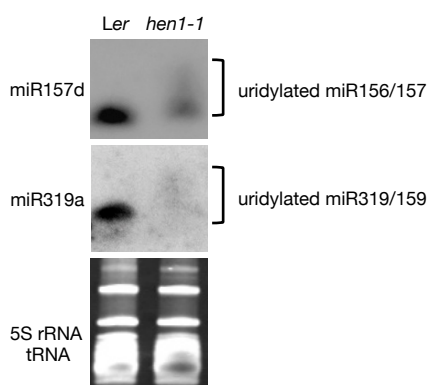

**Supplemental Figure 9. The expressions of miR157d and miR319 are compromised in *hen1-1* mutant**

Four-day-old etiolated wild-type (*Ler*) and *hen1-1* seedlings were treated with W ( $50 \mu\text{mol m}^{-2} \text{s}^{-1}$ ) for 24 h, and then RNA gel blot analysis was carried out with  $1 \mu\text{g}$  total RNA. DNA oligos used for each blot are indicated to the left of each blot. Despite the clear detection of miR156/157 and miR319/159 in *Ler*, only traces of uridylated miR156/157 and miR319/159 were detected in *hen1-1*. Ethidium-bromide-stained rRNA/tRNA is shown as loading control.

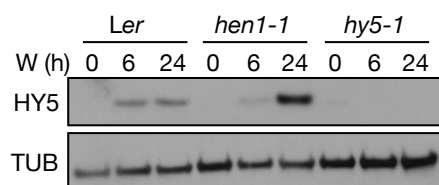

**Supplemental Figure 10. HY5 is increased in the *hen1-1* mutant during photomorphogenesis**

Protein levels of HY5 in 4-d-old de-etiolating seedlings of wild type (*Ler*) and *hen1-1* under W ( $100 \mu\text{mol m}^{-2} \text{s}^{-1}$ ) at the indicated times. HY5 was not detected in the *hy5-1* mutant. TUB was used as a loading control.

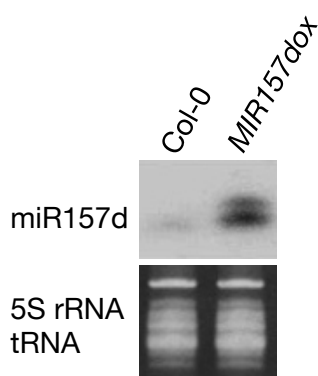

**Supplemental Figure 11. Over-accumulation of miR157d detected in the *MIR157dox* line**

RNA gel blot analysis of the miR157d levels in 4-d-old Wc ( $100 \mu\text{mol m}^{-2} \text{s}^{-1}$ )-grown seedlings of the wild type (Col-0) and *MIR157d* overexpression line (*MIR157dox*). DNA oligos used for each blot are indicated to the left of each blot. Each sample contained 1  $\mu\text{g}$  total RNA.

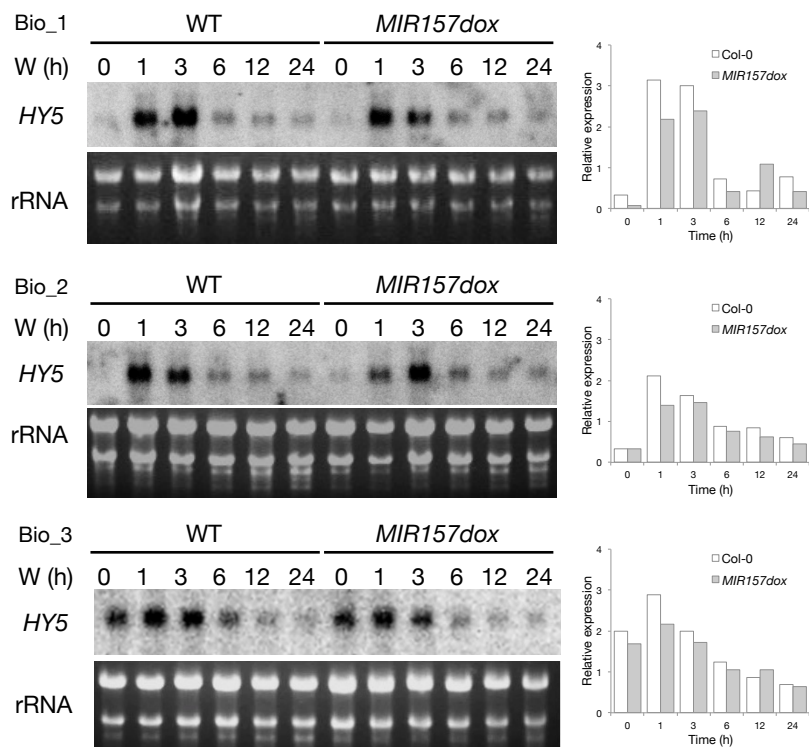

**Supplemental Figure 12. The *HY5* transcript levels are decreased in the *MIR157dox* transgenic line**

Three biological replicates of RNA gel blot analyses on *HY5* transcript levels in *MIR157dox* transgenic line during the de-etiolation. The replicate Bio\_1 was shown in Figure 8A. The etiolated seedlings on the time 0 point were collected in the dark except those on Bio\_3 time 0, which were collected under the light. The bar graphs show the *HY5* signals normalized to ribosomal RNA using Image J on each biological replicate.

Supplemental Table 1. **Primers and oligos used in this study**

| Primer                                | Sequence (5' to 3')                     |
|---------------------------------------|-----------------------------------------|
| <u>Quantitative RT-PCR analysis</u>   |                                         |
| <i>HEN1</i> -F                        | CAACGTCAAATCTGCTACACTTT                 |
| <i>HEN1</i> -R                        | AAGTGCCGATGTCAACGTCAT                   |
| <i>HY5</i> -F                         | ATGTTAAAATTATATGGGATGTGAGAGCTAA         |
| <i>HY5</i> -R                         | TTCAATTAAGAGAAATCTAAGACTACAATAAGAGA     |
| <i>TCP2</i> -F                        | GGTGGCTTCAGTGGTTTCAAC                   |
| <i>TCP2</i> -R                        | CCTCTGTAGATTAGCGAGGAATGAC               |
| <i>TCP3</i> -F                        | CCGGAGGATTTGTGTTTGTCT                   |
| <i>TCP3</i> -R                        | CCCCTCTGTGATAAAAAGCTGACTT               |
| <i>TCP4</i> -F                        | CAAAGCCAACAGCTTTATTCTCAGA               |
| <i>TCP4</i> -R                        | GATGATGGTGAGGATCAAACCA                  |
| <i>TCP10</i> -F                       | TGTTTCTTGGTGGCCAACAA                    |
| <i>TCP10</i> -R                       | TGATCCCAAGAACGAAACGAAT                  |
| <i>TCP24</i> -F                       | ACCCATTCTCCTTTGTACCTGATT                |
| <i>TCP24</i> -R                       | AAGAGAGATTGTGAATTGGACTGAAG              |
| <i>UBQ10</i> -F (Col-0)               | AGAAGTTCAATGTTTCGTTTCATGTAA             |
| <i>UBQ10</i> -R (Col-0)               | GAACGGAACATAGTAGAACACTTATTCA            |
| <i>UBQ10</i> -F (Ler)                 | ACAGCTAGAGGATGGCCGTA                    |
| <i>UBQ10</i> -R (Ler)                 | GTTGGTCTGGCGGGATAC                      |
| <i>GFP</i> -F                         | GATGGCCCTGTCTTTTACCA                    |
| <i>GFP</i> -R                         | GGCAGATTGTGTGGACAGGTAAT                 |
| <i>UBI3</i> -F (N.b.)                 | GCCGACTACAACATCCAGAAGG                  |
| <i>UBI3</i> -R (N.b.)                 | TGCAACACAGCGAGCTTAACC                   |
| Northern blot probe                   |                                         |
| <i>HEN1</i> -F                        | TCTCCATGGATTTTCAGGGGTATGCACATT          |
| <i>HEN1</i> -R                        | CGCTCTAAGGTGAGCTCCCA                    |
| <i>HY5</i> -F                         | GTAGTCGACCAGAGATCTGACGGCGGTAG           |
| <i>HY5</i> -R                         | GTAGGATCCCCTCCGCCGGTGTCTCCCT            |
| miR157d-probe                         | GAGTGCTCTCTATCTTCTGTCATCAAAGAGAATCAATGA |
| miR156a-probe                         | GTGCTCACTCTCTTCTGTCA                    |
| miR319a-probe                         | AGGGAGCTCCCTTCAGTCCAA                   |
| <i>MIR</i> gene amplification         |                                         |
| <i>MIR156a</i> -F                     | GTATCTAGACTCTTATCTTCTTCTCATCAG          |
| <i>MIR156a</i> -R                     | GTACCCGGGAACAAGAACAAGCCAGAGTT           |
| <i>MIR157d</i> -F                     | GTATCTAGACCACTTACTCTTCACCGCCC           |
| <i>MIR157d</i> -R                     | GTACCCGGGTATAACATGAACTGATGAACCT         |
| <u><i>HEN1</i> gene amplification</u> |                                         |
| <i>HEN1</i> genomic-F                 | CGAGGTACCATGGCCGGTGGTGGGAAGCA           |
| <i>HEN1</i> genomic-R                 | TGTCTAGGTCAAAGATCAGTCTTTTTTC            |
| <u><i>HEN1</i> complementation</u>    |                                         |
| <i>HEN1</i> -gDNA-SalI-S1             | AGCGTCGACTGTTATGTGGTATGTATA             |
| <i>HEN1</i> -gDNA-S1642               | CATGAAAGTCCGCTGAACCTTTAGGTTTCGTTGTGCG   |
| <i>HEN1</i> -gDNA-S3266               | GATGTTTGGCAAAGCTTCTGTGGCTCTGAGTGTAG     |
| <i>HEN1</i> -gDNA-S4862               | CAAAGTTATGTAAGAACCCTCACGTAAAGTCTTCTGG   |
| <i>HEN1</i> -gDNA-AS1678              | TCGACAACGAACCTAAAGAGTTTCAGCGGACTTTTCAT  |
| <i>HEN1</i> -gDNA-AS3302              | TCTACACTCAGAGCCACAGGAAGCTTTGCCAAACAT    |
| <i>HEN1</i> -gDNA-AS4897              | CAGAAGACTTTACGTGAGGTTCTTACATAACTTTGC    |
| <i>HEN1</i> -gDNA-PmlI-AS6627         | AGCACGTGTTAAACTTCAACGGACCA              |

|                                                 |                                          |
|-------------------------------------------------|------------------------------------------|
| <i>HY5</i> 5'UTR amplification                  |                                          |
| <i>HY5</i> -5'UTR-F                             | TCTAGAGTCCCCTCTTTTCCTCTTTATC             |
| <i>HY5</i> -5'UTR-R                             | CTCGAGTTTTCTTACTCTTTGAAGATCGAT           |
| <i>HY5</i> -5'UTR <sub>m</sub> -F               | TTCCTCCAATACCTTTTCACCAG                  |
| <i>HY5</i> -5'UTR <sub>m</sub> -R               | GCTGGTGAAAAGGTATTGGA                     |
| <i>mHY5</i> cDNA                                |                                          |
| <i>HY5</i> -5'UTR <sub>m</sub> - <i>Xba</i> I-F | GACTCTAGATCCCCTCTTTTCCTCCAATACCTTTTCACCA |
| <i>HY5</i> <i>stop</i> - <i>Eco</i> RI-R        | TCGGAATTCTCAAAGGCTTGCATCAGCAT            |
| 5'-RACE                                         |                                          |
| <i>HY5</i> -R                                   | TCCTCCCTCGCTTCCTTTGACTTTC                |
| <i>TCP24</i> -R                                 | TCTCCTTTCCTTTGCCTTGTCAT                  |

---
